# Supplementary material for: Cloning and comparative modeling identifies a highly stress tolerant Cu/Zn cytosolic super oxide dismutase 2 from a drought tolerant maize inbred line
Source: PeerJ. 2023 Mar 13;11:e14845. doi: 10.7717/peerj.14845 (PMC10019340; doi:10.7717/peerj.14845)
Supplement: Supplemental Information 1 [file peerj-11-14845-s001.xlsx]

## Sheet: Table S1
					Table S1 Protein Protein Interaction Analyses
#clustering method	cluster number	cluster color	gene count	protein name	protein identifier	x_position	y_position	protein description
kmeans	1	Red	1	sod3	4577.GRMZM2G059991_P01	0.386	0.6925	Superoxide dismutase [Mn] 3.1 mitochondrial; Destroys superoxide anion radicals which are normally produced within the cells and which are toxic to biological systems
kmeans	2	Brown	1	541646	4577.GRMZM5G864424_P01	0.550308	0.175	Superoxide dismutase; Destroys radicals which are normally produced within the cells and which are toxic to biological systems
kmeans	3	Dark Golden Rod	1	GRMZM2G125151_P01	4577.GRMZM2G125151_P01	0.585385	0.73	Uncharacterized protein
kmeans	4	Green Yellow	1	IDP712	4577.GRMZM2G175728_P01	0.365692	0.35	Copper chaperone for superoxide dismutase
kmeans	5	Green	2	SODA.3	4577.GRMZM2G124455_P01	0.515231	0.8375	Superoxide dismutase [Mn] 3.4 mitochondrial; Destroys superoxide anion radicals which are normally produced within the cells and which are toxic to biological systems
kmeans	5	Green	2	sod2	4577.GRMZM2G025992_P01	0.497692	0.4325	Superoxide dismutase [Cu-Zn] 2; Destroys radicals which are normally produced within the cells and which are toxic to biological systems; Belongs to the Cu-Zn superoxide dismutase family
kmeans	6	Green	1	100217217	4577.GRMZM5G864335_P01	0.583538	0.4225	2-Cys peroxiredoxin BAS1 chloroplastic
kmeans	7	Blue	1	PER1	4577.GRMZM2G129761_P01	0.458923	0.7725	1-Cys peroxiredoxin PER1; Thiol-specific peroxidase that catalyzes the reduction of hydrogen peroxide and organic hydroperoxides to water and alcohols respectively (By similarity). Seems to contribute to the inhibition of germination during stress (By similarity); Belongs to the peroxiredoxin family. Prx6 subfamily
kmeans	8	Light Sky Blue	1	GRMZM2G139680_P01	4577.GRMZM2G139680_P01	0.458	0.2775	2-cys peroxiredoxin BAS1; Uncharacterized protein
kmeans	9	Medium Blue	1	pco095461	4577.GRMZM2G106928_P02	0.445077	0.55	Superoxide dismutase [Cu-Zn]; Destroys radicals which are normally produced within the cells and which are toxic to biological systems; Belongs to the Cu-Zn superoxide dismutase family
kmeans	10	Purple	1	GRMZM2G157018_P01	4577.GRMZM2G157018_P01	0.627846	0.5525	ATP synthase subunit d mitochondrial; Mitochondrial membrane ATP synthase (F(1)F(0) ATP synthase or Complex V) produces ATP from ADP in the presence of a proton gradient across the membrane which is generated by electron transport complexes of the respiratory chain. F-type ATPases consist of two structural domains F(1) - containing the extramembraneous catalytic core and F(0) - containing the mem…

## Sheet: Table S2
Table S2 String Interactions
#node1	node2	node1_string_id	node2_string_id	neighborhood_on_chromosome	gene_fusion	phylogenetic_cooccurrence	homology	coexpression	experimentally_determined_interaction	database_annotated	automated_textmining	combined_score
100217217	sod2	4577.GRMZM5G864335_P01	4577.GRMZM2G025992_P01	0	0	0	0	0.246	0.597	0	0.539	0.847
100217217	sod3	4577.GRMZM5G864335_P01	4577.GRMZM2G059991_P01	0.157	0	0	0	0.118	0	0	0.488	0.586
100217217	pco095461	4577.GRMZM5G864335_P01	4577.GRMZM2G106928_P02	0	0	0	0	0.246	0.597	0	0.539	0.847
100217217	SODA.3	4577.GRMZM5G864335_P01	4577.GRMZM2G124455_P01	0.157	0	0	0	0.118	0	0	0.488	0.586
100217217	GRMZM2G125151_P01	4577.GRMZM5G864335_P01	4577.GRMZM2G125151_P01	0.158	0	0	0	0.18	0.527	0	0.546	0.831
100217217	PER1	4577.GRMZM5G864335_P01	4577.GRMZM2G129761_P01	0	0	0	0.729	0.137	0.756	0	0.741	0.823
100217217	GRMZM2G157018_P01	4577.GRMZM5G864335_P01	4577.GRMZM2G157018_P01	0	0	0	0	0.265	0	0	0.552	0.656
100217217	IDP712	4577.GRMZM5G864335_P01	4577.GRMZM2G175728_P01	0	0	0	0	0	0	0	0.462	0.461
100217217	541646	4577.GRMZM5G864335_P01	4577.GRMZM5G864424_P01	0.157	0	0	0	0.118	0	0	0.488	0.586
541646	sod2	4577.GRMZM5G864424_P01	4577.GRMZM2G025992_P01	0	0	0	0	0.102	0.395	0	0.724	0.837
541646	pco095461	4577.GRMZM5G864424_P01	4577.GRMZM2G106928_P02	0	0	0	0	0.102	0.395	0	0.729	0.84
541646	GRMZM2G125151_P01	4577.GRMZM5G864424_P01	4577.GRMZM2G125151_P01	0.162	0	0	0	0.218	0.138	0	0.508	0.684
541646	PER1	4577.GRMZM5G864424_P01	4577.GRMZM2G129761_P01	0.157	0	0	0	0.173	0	0	0.539	0.65
541646	GRMZM2G139680_P01	4577.GRMZM5G864424_P01	4577.GRMZM2G139680_P01	0.157	0	0	0	0.118	0	0	0.488	0.586
541646	GRMZM2G157018_P01	4577.GRMZM5G864424_P01	4577.GRMZM2G157018_P01	0	0	0	0	0.629	0	0	0.045	0.63
541646	IDP712	4577.GRMZM5G864424_P01	4577.GRMZM2G175728_P01	0	0	0	0	0	0	0	0.511	0.511
GRMZM2G125151_P01	sod2	4577.GRMZM2G125151_P01	4577.GRMZM2G025992_P01	0.048	0	0	0	0.117	0.604	0	0.443	0.789
GRMZM2G125151_P01	sod3	4577.GRMZM2G125151_P01	4577.GRMZM2G059991_P01	0.162	0	0	0	0.218	0.138	0	0.508	0.684
GRMZM2G125151_P01	pco095461	4577.GRMZM2G125151_P01	4577.GRMZM2G106928_P02	0.048	0	0	0	0.117	0.604	0	0.443	0.789
GRMZM2G125151_P01	SODA.3	4577.GRMZM2G125151_P01	4577.GRMZM2G124455_P01	0.162	0	0	0	0.218	0.138	0	0.508	0.684
GRMZM2G125151_P01	GRMZM2G157018_P01	4577.GRMZM2G125151_P01	4577.GRMZM2G157018_P01	0	0	0	0	0.428	0	0	0.247	0.55
GRMZM2G125151_P01	PER1	4577.GRMZM2G125151_P01	4577.GRMZM2G129761_P01	0.158	0	0	0	0.173	0.527	0	0.546	0.83
GRMZM2G125151_P01	GRMZM2G139680_P01	4577.GRMZM2G125151_P01	4577.GRMZM2G139680_P01	0.158	0	0	0	0.18	0.527	0	0.546	0.831
GRMZM2G139680_P01	sod2	4577.GRMZM2G139680_P01	4577.GRMZM2G025992_P01	0	0	0	0	0.246	0.597	0	0.539	0.847
GRMZM2G139680_P01	sod3	4577.GRMZM2G139680_P01	4577.GRMZM2G059991_P01	0.157	0	0	0	0.118	0	0	0.488	0.586
GRMZM2G139680_P01	pco095461	4577.GRMZM2G139680_P01	4577.GRMZM2G106928_P02	0	0	0	0	0.246	0.597	0	0.584	0.862
GRMZM2G139680_P01	SODA.3	4577.GRMZM2G139680_P01	4577.GRMZM2G124455_P01	0.157	0	0	0	0.118	0	0	0.488	0.586
GRMZM2G139680_P01	PER1	4577.GRMZM2G139680_P01	4577.GRMZM2G129761_P01	0	0	0.304	0.731	0.137	0.756	0	0.741	0.836
GRMZM2G139680_P01	IDP712	4577.GRMZM2G139680_P01	4577.GRMZM2G175728_P01	0	0	0	0	0	0	0	0.462	0.461
GRMZM2G139680_P01	GRMZM2G157018_P01	4577.GRMZM2G139680_P01	4577.GRMZM2G157018_P01	0	0	0	0	0.265	0	0	0.552	0.656
GRMZM2G157018_P01	sod2	4577.GRMZM2G157018_P01	4577.GRMZM2G025992_P01	0	0	0	0	0.609	0	0	0.596	0.835
GRMZM2G157018_P01	sod3	4577.GRMZM2G157018_P01	4577.GRMZM2G059991_P01	0	0	0	0	0.629	0	0	0.045	0.63
GRMZM2G157018_P01	pco095461	4577.GRMZM2G157018_P01	4577.GRMZM2G106928_P02	0	0	0	0	0.609	0	0	0.512	0.801
GRMZM2G157018_P01	SODA.3	4577.GRMZM2G157018_P01	4577.GRMZM2G124455_P01	0	0	0	0	0.629	0	0	0.045	0.63
GRMZM2G157018_P01	PER1	4577.GRMZM2G157018_P01	4577.GRMZM2G129761_P01	0	0	0	0	0.172	0	0	0.327	0.418
IDP712	sod2	4577.GRMZM2G175728_P01	4577.GRMZM2G025992_P01	0	0	0	0.649	0.851	0.83	0	0.653	0.979
IDP712	sod3	4577.GRMZM2G175728_P01	4577.GRMZM2G059991_P01	0	0	0	0	0	0	0	0.511	0.511
IDP712	pco095461	4577.GRMZM2G175728_P01	4577.GRMZM2G106928_P02	0	0	0	0.635	0.926	0.83	0	0.743	0.99
IDP712	SODA.3	4577.GRMZM2G175728_P01	4577.GRMZM2G124455_P01	0	0	0	0	0	0	0	0.511	0.511
IDP712	PER1	4577.GRMZM2G175728_P01	4577.GRMZM2G129761_P01	0	0	0	0	0	0	0	0.462	0.461
PER1	sod2	4577.GRMZM2G129761_P01	4577.GRMZM2G025992_P01	0	0	0	0	0.166	0.347	0	0.597	0.761
PER1	sod3	4577.GRMZM2G129761_P01	4577.GRMZM2G059991_P01	0.157	0	0	0	0.173	0	0	0.539	0.65
PER1	pco095461	4577.GRMZM2G129761_P01	4577.GRMZM2G106928_P02	0	0	0	0	0.166	0.347	0	0.597	0.761
PER1	SODA.3	4577.GRMZM2G129761_P01	4577.GRMZM2G124455_P01	0.157	0	0	0	0.173	0	0	0.539	0.65
SODA.3	sod2	4577.GRMZM2G124455_P01	4577.GRMZM2G025992_P01	0	0	0	0	0.102	0.395	0	0.724	0.837
SODA.3	pco095461	4577.GRMZM2G124455_P01	4577.GRMZM2G106928_P02	0	0	0	0	0.102	0.395	0	0.597	0.761
pco095461	sod2	4577.GRMZM2G106928_P02	4577.GRMZM2G025992_P01	0	0	0.449	0.933	0.84	0	0	0.754	0.852
pco095461	sod3	4577.GRMZM2G106928_P02	4577.GRMZM2G059991_P01	0	0	0	0	0.102	0.395	0	0.782	0.871
sod2	sod3	4577.GRMZM2G025992_P01	4577.GRMZM2G059991_P01	0	0	0	0	0.102	0.395	0	0.803	0.883

## Sheet: Table S3
Table S3 Domain and post translational modifications sites
Name	Start	End	E-value	Definition	Sequence	GO function	GO process
Pfam:Sod_Cu	8	147	2.6e-49	Ubiquitous metalloproteins that prevent damage by oxygen-mediated free radicals by catalysing the dismutation of superoxide into molecular oxygen and hydrogen peroxide	LAGTDVKGTIFFSQEGDGPTTVTGSISGLKPGLHGFHVHALGDTTNGCMSTGPHFNPVGKEHGAPEDEDRHAGDLGNVTAGEDGVVNVNITDSQIPLAGPHSIIGRAVVVHADPDDLGKGGHELSKSTGNAGGRVACGII	Metal ion binding	Superoxide metabolic process
Outlier homologues and homologous of known structure
Name	Start	End	E-value	Sequence
PDB:2Q2L|B	1	151	3e-87	VKAVAVLAGTDVKGTIFFSQEGDGPTTVTGSISGLKPGLHGFHVHALGDTTNGCMSTGPHFNPVGKEHGAPEDEDRHAGDLGNVTAGEDGVVNVNITDSQIPLAGPHSIIGRAVVVHADPDDLGKGGHELSKSTGNAGGRVACGIIGLQG
SCOP:d1xsoa_	2	149	4e-66	KAVAVLAGTDVKGTIFFSQEGDGPTTVTGSISGLKPGLHGFHVHALGDTTNGCMSTGPHFNPVGKEHGAPEDEDRHAGDLGNVTAGEDGVVNVNITDSQIPLAGPHSIIGRAVVVHADPDDLGKGGHELSKSTGNAGGRVACGIIGL
PTM Sites
Protein ID	Locations	PTM types	Residues	Local sequences	Score
B6T056_MAIZE	20	Phosphorylation/Atypical	S	GTDVKGTIFFSQEGDGPTTVT	0.692
