# Supplementary material for: Cloning and comparative modeling identifies a highly stress tolerant Cu/Zn cytosolic super oxide dismutase 2 from a drought tolerant maize inbred line
Source: PeerJ journal article supplement (doi:10.7717/peerj.14845), 2023-03-13
Supplement: Supplementary_Figures_Gautam_et_al_2022.pdf [file Supplementary_Figures_Gautam_et_al_2022.pdf]

## Cloning and comparative modeling identifies a highly stress tolerant Cu/Zn cytosolic Super Oxide Dismutase 2 from a drought tolerant maize inbred line

Anuradha Gautam<sup>1</sup>, Fatima Nazish Khan<sup>2,3</sup>, Surabhi Priya<sup>1</sup>, Krishan Kumar<sup>1</sup>, Shivani Sharda<sup>4</sup>, Tanushri Kaul<sup>5</sup>, Ishwar Singh<sup>1</sup>, Sapna Langyan<sup>6\*</sup>, Pranjal Yadava<sup>1,2\*</sup>

<sup>1</sup> ICAR- Indian Institute of Maize Research, Pusa Campus, New Delhi, 110012, India

<sup>2</sup> Division of Plant Physiology, Indian Agricultural Research Institute, Pusa, New Delhi, 110012, India

<sup>3</sup> Department of Biotechnology, Jamia Millia Islamia, Jamia Nagar, New Delhi, 110025, India

<sup>4</sup> Amity Institute of Biotechnology, Amity University, Sector-125, Noida, UP, 201313, India

<sup>5</sup> International Centre for Genetic Engineering and Biotechnology, Aruna Asaf Ali Marg, New Delhi, 110067, India

<sup>6</sup> Division of Germplasm Evaluation, ICAR- National Bureau of Plant Genetic Resources, Pusa Campus, New Delhi, India

### SUPPLEMENTARY FIGURES

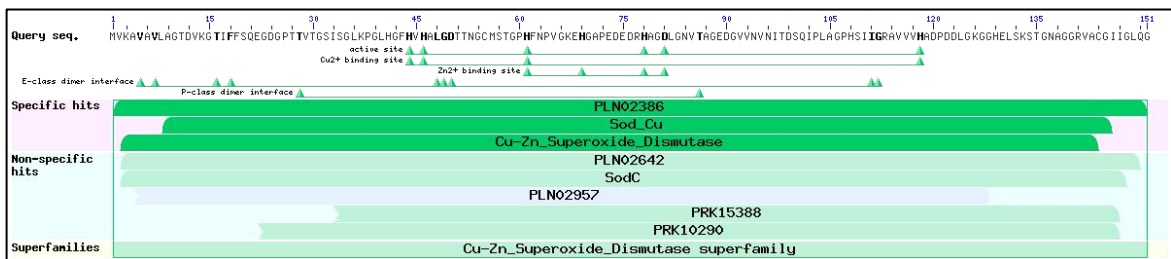

**Figure S1: Conserved domains in the cloned ZmSOD2 protein from drought tolerant inbred HKI 335 (ALF00121.1).**

1st line -> residue numeration

2nd line -> query amino acid sequence

3rd line -> trans-membrane domain prediction (T-TM region, N-soluble part)

```
> 1 60
MVKAVAVLAGTDVKGTIFFSQEGDGPTTVTGSISGLKPGLHGFHVHALGDTTNGCMSTGP
NNNNNNNNNNNNNNNNNNNNNNNNNNNNNNNNNNNNNNNNNNNNNNNNNNNNNNNNNNNN
```

```
> 61 120
HFNPVGKEHGAPEDDRHAGDLGNVTAGEDGVVNVNITDSQIPLAGPHSIIGRAVVVHAD
NNNNNNNNNNNNNNNNNNNNNNNNNNNNNNNNNNNNNNNNNNNNNNNNNNNNNNNNNNNN
```

```
> 121 151
PDDLGGKGGHELKSTGNAGGRVACGHIIGLQG
NNNNNNNNNNNNNNNNNNNNNNNNNNNNNNNNNNNNNNNNNNNNNNNNNNNNNNNNNNNN
```

END\_SECTION

**Figure S2: Trans-membrane domain prediction showing that protein is soluble and no trans-membrane region is found.**
